# Supplementary material for: Colorimetric detection of Hg2+ based on the enhanced oxidase-mimic activity of CuO/Au@Cu3(BTC)2 triggered by Hg2+
Source: Royal Society of Chemistry journal article supplement (doi:10.1039/d4ra01953a), 2024-01-01
Supplement: d4ra01953a1.pdf [file d4ra01953a1.pdf]

## Supplementary Information

### **Colorimetric detection of Hg<sup>2+</sup> based on the enhanced oxidase-mimic activity of CuO/Au@Cu<sub>3</sub>(BTC)<sub>2</sub> triggered by Hg<sup>2+</sup>**

Min Yang <sup>a</sup>, Jian Wang <sup>\*b</sup>, Xuan Xue <sup>a</sup> and Hechun Jiang <sup>\*c</sup>

<sup>a</sup> School of Pharmacy, Anhui University of Chinese Medicine, Hefei, China, 230012

<sup>b</sup> School of Chemistry and Chemical Engineering, Shandong University, Jinan, China, 250100

<sup>c</sup> State Key Laboratory of Crystal Materials and Institute of Crystal Materials, Shandong University,

Jinan, China, 250100

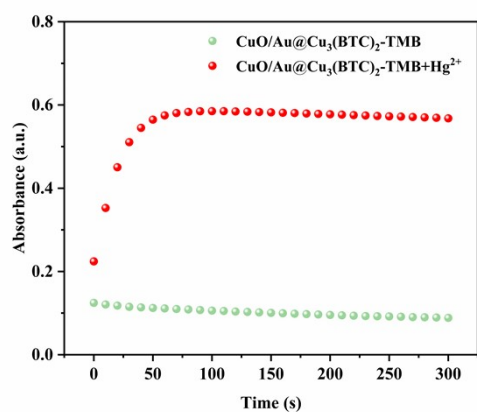

**Fig. S1 Time-dependent absorbance changes at 652 nm of CuO/Au@Cu<sub>3</sub>(BTC)<sub>2</sub>-TMB in the presence and absence of 10 μM Hg<sup>2+</sup>.**

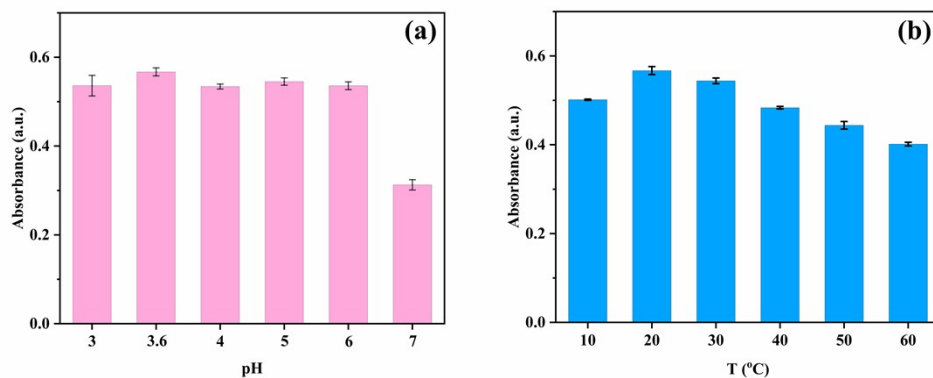

**Fig. S2 Influences of (a) pH, and (b) temperature to absorbance at 652 nm of CuO/Au@Cu<sub>3</sub>(BTC)<sub>2</sub>-Hg<sup>2+</sup>-TMB.**

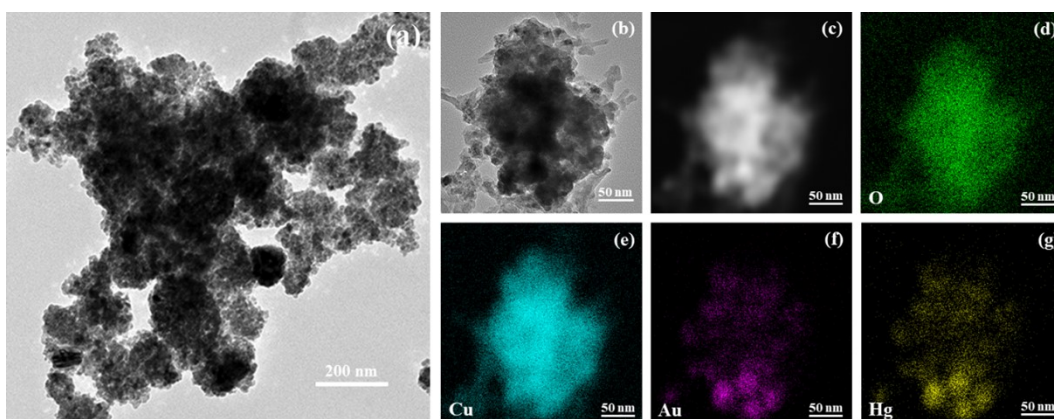

**Fig. S3 Morphology characterizations of CuO/Au@Cu<sub>3</sub>(BTC)<sub>2</sub> after adding Hg<sup>2+</sup>. (a) TEM images, (b) magnification TEM images, and (c-g) EDX-mapping images.**

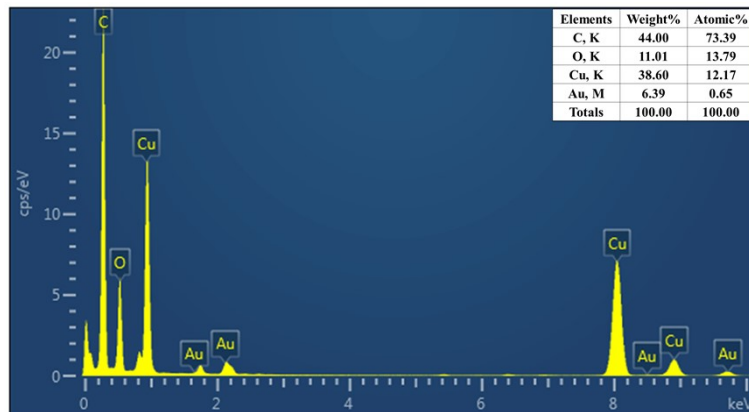

Fig. S4 EDX spectroscopy of CuO/Au@Cu<sub>3</sub>(BTC)<sub>2</sub>.

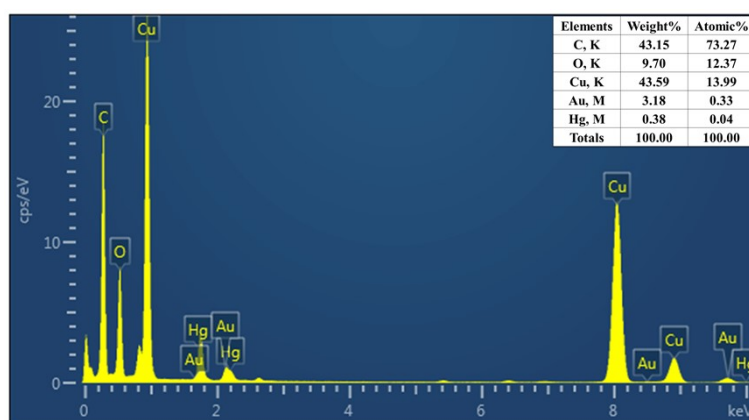

Fig. S5 EDX spectroscopy of CuO/Au@Cu<sub>3</sub>(BTC)<sub>2</sub> after adding Hg<sup>2+</sup>.

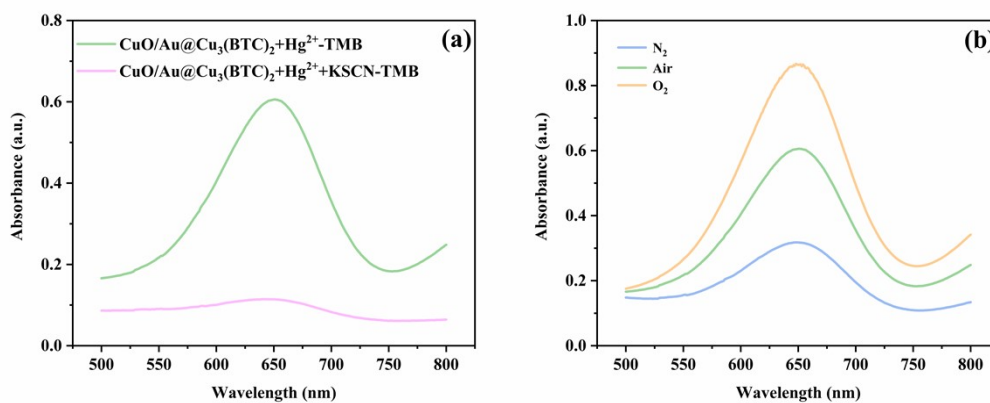

Fig. S6 UV-vis absorbance spectra of CuO/Au@Cu<sub>3</sub>(BTC)<sub>2</sub>-Hg<sup>2+</sup>-TMB (a) with 50  $\mu$ M KSCN, (b) in N<sub>2</sub>, air, and O<sub>2</sub>.

**Table S1 Comparison of kinetics constants of oxidase-like nanozymes**

| Materials                                                | Km (mM) | Vmax (10 <sup>-8</sup> M/s) | Reference |
|----------------------------------------------------------|---------|-----------------------------|-----------|
| Fe-N/S-C                                                 | 0.45    | 9.5                         | 1         |
| Cu <sub>3</sub> /ND@G                                    | 2.98    | 11.5                        | 2         |
| Pt/Co <sub>3</sub> O <sub>4</sub>                        | 8.77    | 15.1                        | 3         |
| Co <sub>4</sub> S <sub>3</sub> /Co(OH) <sub>2</sub> HNTs | 1.33    | 46.6                        | 4         |
| Co,N,S co-doped hollow carbon                            | 0.25    | 41.9                        | 5         |
| Ag <sub>2</sub> S@graphene oxide                         | 0.10    | 3.9                         | 6         |
| NiSe <sub>2</sub>                                        | 0.36    | 20.6                        | 7         |
| CuO/Au@Cu <sub>3</sub> (BTC) <sub>2</sub>                | 0.74    | 62.9                        | This work |

**Table S2 Comparison of mercury ion detection methods based on nanozymes**

| Materials                                  | Linear range (μM) | LOD (nM) | Method                               | Reference |
|--------------------------------------------|-------------------|----------|--------------------------------------|-----------|
| Co,N,S co-doped hollow carbon              | 1-5, 5-9          | 90       | Colorimetric                         | 5         |
| Ag <sub>2</sub> S@graphene oxide           | 0.05-1.2          | 9.8      | Colorimetric                         | 6         |
|                                            | 0.01-0.7          | 5.18     | Colorimetric                         |           |
| NiSe <sub>2</sub>                          | 0-0.7             | 8.42     | Smartphone-based colorimetric sensor | 7         |
| Ag nanoparticles                           | 0-600             | 34.8     | Colorimetric                         | 8         |
| Hollow MnFeO                               | 0.1 –15           | 20       | Colorimetric                         | 9         |
| Ag <sub>3</sub> PO <sub>4</sub> microcubes | 0.1-7.0           | 20       | Colorimetric                         | 10        |
| SnTe/Au                                    | 0.2 -58.0         | 150      | Colorimetric                         | 11        |
| CuO/Au@Cu <sub>3</sub> (BTC) <sub>2</sub>  | 0.05-25           | 9.7      | Colorimetric                         | This work |

**Reference**

- 1 R. Li, X. He, R. Javed, J. Cai, H. Cao, X. Liu, Q. Chen, D. Ye and H. Zhao, Switching on-off-on colorimetric sensor based on Fe-N/S-C single-atom nanozyme for ultrasensitive and multimodal detection of Hg<sup>2+</sup>, *Sci. Total Environ.*, 2022, **834**, 155428.
- 2 F. Meng, M. Peng, Y. Chen, X. Cai, F. Huang, L. Yang, X. Liu, T. Li, X. Wen, N. Wang, D. Xiao, H. Jiang, L. Xia, H. Liu and D. Ma, Defect-rich graphene stabilized atomically dispersed Cu<sub>3</sub> clusters with enhanced oxidase-like activity for antibacterial applications, *Appl. Catal. B-Environ.*, 2022, **301**, 120826.
- 3 M. Sun, S. Huang, G. Su, X. Wang, Z. Lu, Y. Wang, T. Liu, Y. Jiang, C. Song and H. Rao, Synthesis of pH-switchable Pt/Co<sub>3</sub>O<sub>4</sub> nanoflowers: Catalytic mechanism, four-enzyme activity and smartphone biosensing applications, *Chem. Eng. J.*, 2022, **437**, 134414.
- 4 J. Wang, Y. Wang, D. Zhang and C. Chen, Intrinsic oxidase-like nanoenzyme Co<sub>4</sub>S<sub>3</sub>/Co(OH)<sub>2</sub> hybrid nanotubes with broad-spectrum antibacterial activity, *ACS Appl. Mater. Interfaces*, 2020, **12**, 29614-29624.
- 5 X. Yang, M. Feng, X. Zhang and Y. Huang, Co,N,S co-doped hollow carbon with efficient oxidase-like activity for the detection of Hg<sup>2+</sup> and Fe<sup>3+</sup> ions, *Microchem J.*, 2023, **187**, 108383.
- 6 Q. Zhao, W. Gou, X. Zhang, M. Zhang, Y. Bu, L. Wang, L. Hu, W. Yao and Z. Yan, Hg<sup>2+</sup>-activated oxidase-like activity of Ag<sub>2</sub>S@graphene oxide nanozyme and its naked-eye monitoring Hg<sup>2+</sup> application with obvious hyperchromic effect, *Appl. Surf. Sci.*, 2021, **545**, 148973.

- 7 L. Luo, C. Xi, J. Zhuo, G. Liu, S. Yang, Y. Nian, J. Sun, M. Zhu and J. Wang, A portable dual-mode colorimetric platform for sensitive detection of Hg<sup>2+</sup> based on NiSe<sub>2</sub> with Hg<sup>2+</sup>-Activated oxidase-like activity, *Biosens. Bioelectron.*, 2022, **215**, 114519.
- 8 M. T. Alula, M. L. Madingwane, H. Yan, P. Lemmens, L. Zhe and M. Etzkorn, Biosynthesis of bifunctional silver nanoparticles for catalytic reduction of organic pollutants and optical monitoring of mercury (II) ions using their oxidase-mimic activity, *Environ. Sci. Pollut. Res.*, 2022, **29**, 81938-81953.
- 9 Z. Lu, Y. Dang, C. Dai, Y. Zhang, P. Zou, H. Du, Y. Zhang, M. Sun, H. Rao and Y. Wang, Hollow MnFeO oxide derived from MOF@MOF with multiple enzyme-like activities for multifunction colorimetric assay of biomolecules and Hg<sup>2+</sup>, *J. Hazard. Mater.*, 2021, **403**, 123979.
- 10 Y. Zhang, P. Ju, L. Sun, Z. Wang, X. Zhai, F. Jiang and C. Sun, Colorimetric determination of Hg<sup>2+</sup> based on the mercury-stimulated oxidase mimetic activity of Ag<sub>3</sub>PO<sub>4</sub> microcubes, *Microchim. Acta*, 2020, **187**, 422.
- 11 M. Zhang, Y. Qu, D. Li, X. Liu, Y. Niu and Y. Xu, To love and to kill: Accurate and selective colorimetry for both chloride and mercury ions regulated by electro-synthesized oxidase-like SnTe nanobelts, *Anal. Chem.*, 2021, **93**, 10132-10140.
